# Supplementary material for: Construction of Novel Methylation-Driven Gene Model and Investigation of PARVB Function in Glioblastoma
Source: Front Oncol. 2021 Sep 10;11:705547. doi: 10.3389/fonc.2021.705547 (PMC8461318; doi:10.3389/fonc.2021.705547)
Supplement: Supplementary Table 1:1 — The antibody of western blot assays used in this study. [file Table_1.xls]

## Sheet: Antibodies
Supplementary table. Primary antibodies used in the present study
Antigens	Manufacturer	Application
PARVB	ThermoFisher	1:1000 for WB, 1:150 for IHC
E-cadnerin	Cell Signaling Technology	1:1000 for WB, 1:200 for IHC
Claudin-1	Cell Signaling Technology	1:1000 for WB, 1:200 for IHC
N-cadnerin	Cell Signaling Technology	1:1000 for WB, 1:200 for IHC
vimentin	Cell Signaling Technology	1:1000 for WB, 1:200 for IHC
p-JAK2	Cell Signaling Technology	1:1000 for WB
p-Stat3	Cell Signaling Technology	1:1000 for WB
Stat3	Cell Signaling Technology	1:1000 for WB
β-actin	Zsbio Store	1:1000 for WB
